# Supplementary material for: Defect engineered (Er3+/Nd3+) codoped TiO2 photoanodes for enhanced photoelectrochemical and photovoltaic applications
Source: Royal Society of Chemistry journal article supplement (doi:10.1039/d2se01131j), 2022-01-01
Supplement: d2se01131j1.pdf [file d2se01131j1.pdf]

## Supporting information.

# Defect passivation in (Er<sup>3+</sup>/Nd<sup>3+</sup>) codoped TiO<sub>2</sub> photoanode and its application towards enhanced solar energy conversion devices

Venkata Seshaiiah Katta,<sup>1</sup> Muthuraja Velpandian,<sup>2</sup> Subrahmanyam Challapalli,<sup>3</sup> Praveen Meduri,<sup>2</sup> Sai Santosh Kumar Raavi<sup>1,4,\*</sup>

<sup>1</sup> Ultrafast Photophysics and Photonics Laboratory, Department of Physics, Indian Institute of Technology Hyderabad, Kandi 502285, Telangana, India.

<sup>2</sup> Department of Chemical Engineering, Indian Institute of Technology Hyderabad, Kandi 502285, Telangana, India.

<sup>3</sup> Department of Chemistry, Indian Institute of Technology Hyderabad, Kandi 502285, Telangana, India

<sup>4</sup> Department of Climate Change, Indian Institute of Technology Hyderabad, Kandi 502285, Telangana, India.

\*email: [sskraavi@phy.iith.ac.in](mailto:sskraavi@phy.iith.ac.in)

### S1. stoichiometry calculations of RE Co-dopants with TiO<sub>2</sub>

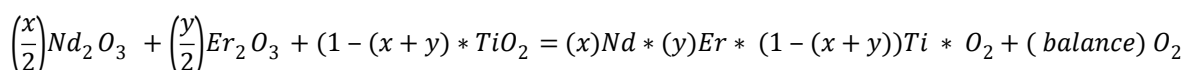

$$\Rightarrow \left(\frac{x}{2}\right)\left(336.48\frac{g}{mol}\right) + \left(\frac{y}{2}\right)\left(382.56\frac{g}{mol}\right) + (1 - (x + y)) * \left(79.87\frac{g}{mol}\right)$$

$$= x (144.2) * y (167.2) * (1 - (x + y))\left(47.87\frac{g}{mol}\right) * 32 + (balance) 32$$

For 1gram amount of powder

$$\Rightarrow Nd_2O_3 \text{ concentration} = \frac{\left(\frac{x}{2}\right)\left(336.48\frac{g}{mol}\right)}{x (144.2) * y (167.2) * (1 - (x + y))\left(47.87\frac{g}{mol}\right) * 32}$$

$$\Rightarrow \text{Er}_2\text{O}_3 \text{ concentration} = \frac{\left(\frac{x}{2}\right)\left(382.56 \frac{\text{g}}{\text{mol}}\right)}{x(144.2) * y(167.2) * (1 - (x + y))\left(47.87 \frac{\text{g}}{\text{mol}}\right) * 32}$$

$$\Rightarrow \text{TiO}_2 \text{ concentration} = \frac{(1 - x) * \left(79.87 \frac{\text{g}}{\text{mol}}\right)}{x(144.2) * y(167.2) * (1 - (x + y))\left(47.87 \frac{\text{g}}{\text{mol}}\right) * 32}$$

## S2. W-H plots

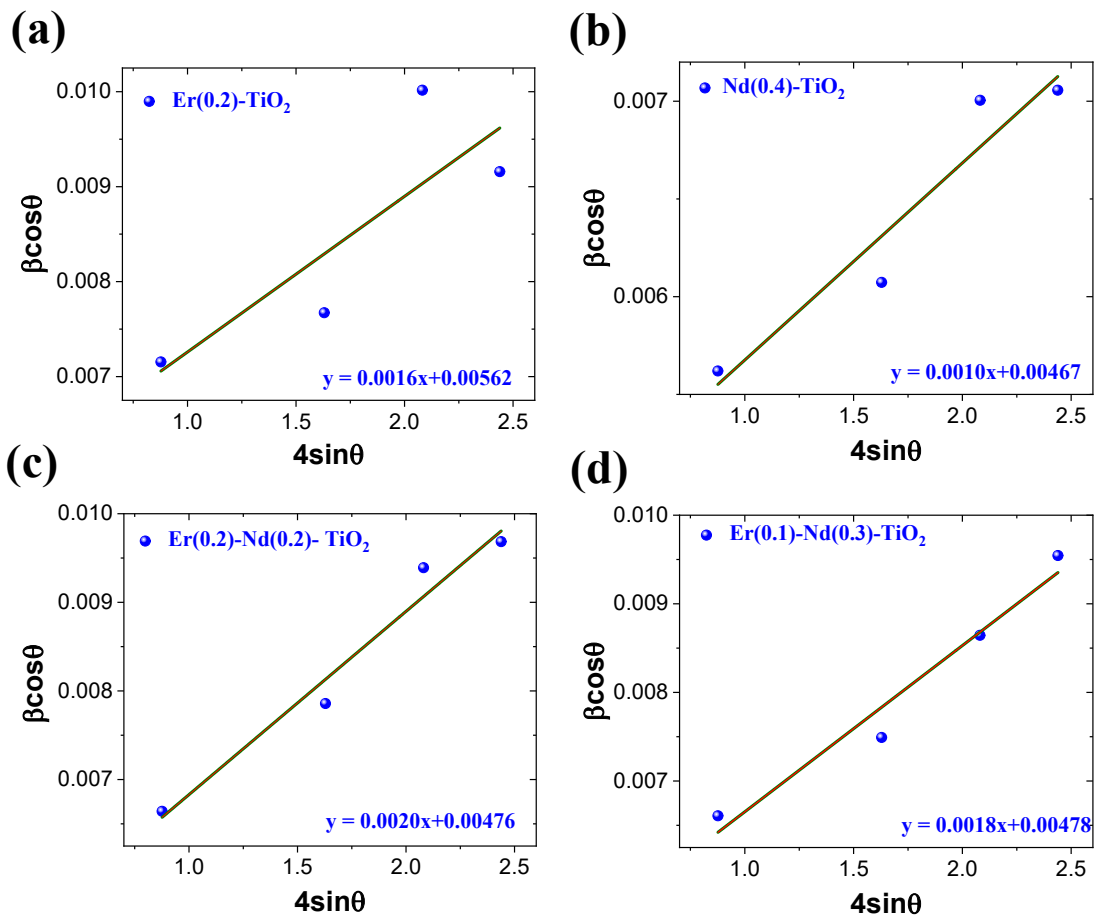

Figure S1(a-d). grain size and stress calculation by W-H method

### S3. UV diffused reflectance spectrum

Er<sup>3+</sup> doped TiO<sub>2</sub> bandgap is found to be increased with respective Er-doping concentrations of 0.1%, 0.3% and 0.4%, as I reported in my previous work<sup>1</sup>. Nd<sup>3+</sup> doped TiO<sub>2</sub> band gap is observed to be reduced with respective Nd doping concentrations of 0.2%, 0.3%, and 0.5% mol as I reported in my previous work<sup>2</sup>.

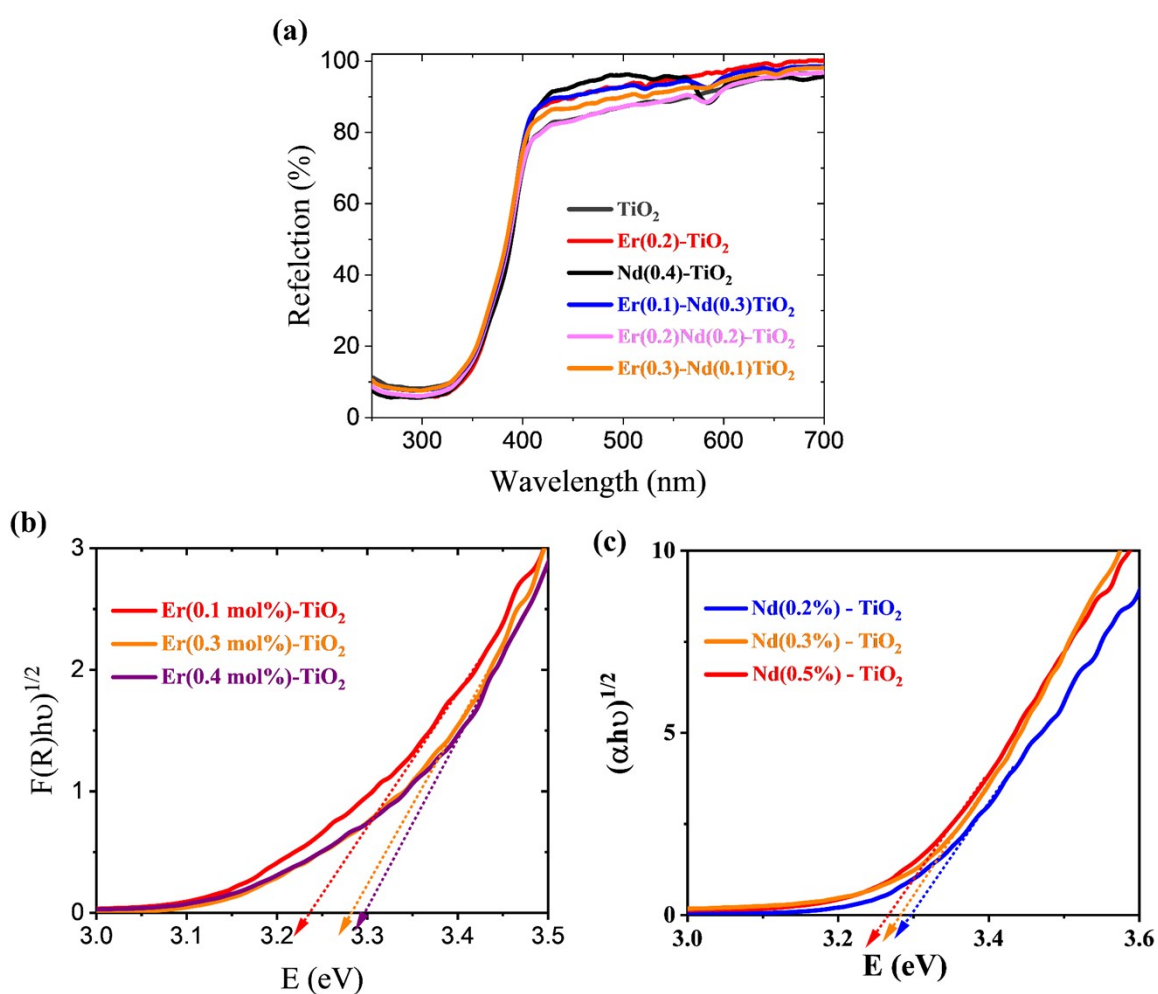

Figure S2. (a) DRS reflectance spectrum; (b-c) bandgap of Er doping series of (0.1%, 0.2%, 0.3, and 0.4% mol), and Nd doping series (0.2%, 0.3%, and 0.5% mol)

### S4. PEC Results

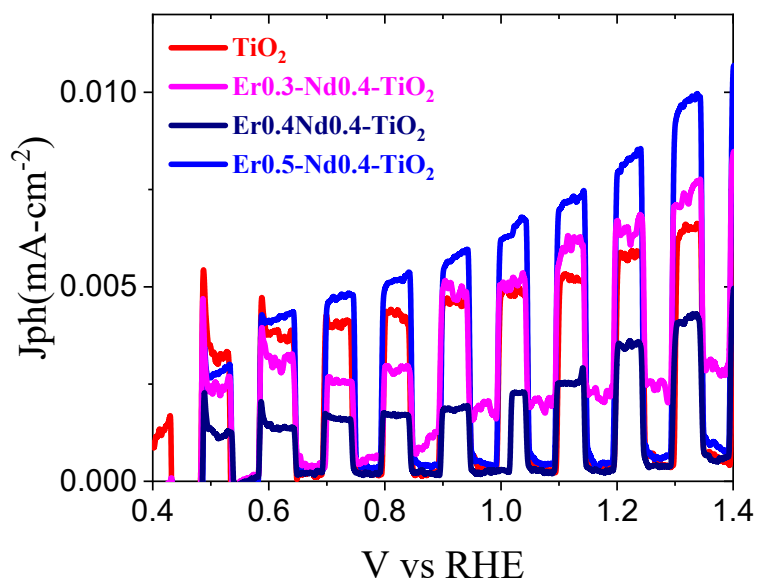

Figure S3. Linear sweep voltammetry of PEC water splitting with neutral  $\text{Na}_2\text{SO}_4$  electrolyte.

## S5. Experimental details

### S5.1. CdS layer deposition

The successive ionic layer deposition (SILAR) technique has been extensively used to fabricate homogeneous quantum dots. Preparation of the controllable-sized CdS quantum dot manufacturing is extremely effective. In this approach,  $\text{TiO}_2$  coated films are dipped for two minutes in a cationic solution of (0.1 M  $\text{Cd}(\text{CH}_3\text{COO})_2 \cdot 2\text{H}_2\text{O}$ , dissolved in ethanol) and washed in ethanol to remove any remaining unabsorbed ions, followed by a two-minute heat treatment at 70°C. The same films were dipped for 2 minutes in an anionic solution (0.1 M  $\text{Na}_2\text{S}$  dissolved in ethanol), washed in ethanol to remove unabsorbed salts, and then thermalized for 2 minutes at 70°C. It is regarded as a single cycle of QDs deposition using the SILAR technique. Similarly, six further cycles were performed to determine the ideal size QDs for the  $\text{TiO}_2$  photoanode<sup>3</sup>.

### S5.2. N719 ruthenium dye loading

0.3 millimoles Ruthenium N719 dye and acetonitrile (ACN) were utilised to produce monolayer dyes on  $\text{TiO}_2$  coated substrates. The films were immersed in a solution of ruthenium. Following dye loading for 24 hours, the samples were washed in acetonitrile to eliminate any remaining dye molecules.

1. V. S. Katta, M. Velpandian, V. R. Chappidi, M. S. Ahmed, A. Kumar, S. Asthana, P. Meduri and S. S. K. Raavi, *Materials Letters*, 2021, 130297.
2. V. S. Katta, A. Das, G. Cilaveni, S. Pulipaka, G. Veerappan, E. Ramasamy, P. Meduri, S. Asthana, D. Melepurath and S. S. K. Raavi, *Solar Energy Materials and Solar Cells*, 2021, **220**, 110843.
3. P. Subramanyam, P. N. Kumar, M. Deepa, C. Subrahmanyam and P. Ghosal, *Solar Energy Materials and Solar Cells*, 2017, **159**, 296-306.
